**Table S1. Comparison of pairing pattern between Archaea and Bacteria in the stem region of the predicted mRNA secondary structures**

| Characteristic                                                                | Archaea                                                                                                                                                                            | Bacteria                                                                                                                                                                           |
|-------------------------------------------------------------------------------|------------------------------------------------------------------------------------------------------------------------------------------------------------------------------------|------------------------------------------------------------------------------------------------------------------------------------------------------------------------------------|
| <b>Natural signal (Nat)</b>                                                   |                                                                                                                                                                                    |                                                                                                                                                                                    |
| The most and least frequent pairs in stem regions of mRNA secondary structure | Mesophiles:<br>Phase 1: G1:1C, U3:2G<br>Phase 2: G1:3C, U1:3G<br>Phase 3: G1:2C, U1:2G<br>Thermophiles:<br>Phase 1: G3:2C, G2:3U<br>Phase 2: G1:3C, U1:3G<br>Phase 3: G1:2C, U1:2G | Mesophiles:<br>Phase 1: G1:1C, U3:2G<br>Phase 2: G1:3C, U1:3G<br>Phase 3: G3:3C, U1:2G<br>Thermophiles:<br>Phase 1: G1:1C, U3:2G<br>Phase 2: G1:3C, U1:3G<br>Phase 3: G3:3C, U1:2G |
| Contributions from the three pairing Phases to the stem pairs                 | Mesophiles:<br>Phase 3 > Phase 2 > Phase 1<br>Thermophiles:<br>Phase 3 > Phase 2 > Phase 1                                                                                         | Mesophiles:<br>Phase 3 > Phase 2 > Phase 1<br>Thermophiles:<br>Phase 2 > Phase 3 > Phase 1                                                                                         |
| The most and least frequent nucleotide involved in pairing                    | Mesophiles: C3, U1<br>Thermophiles: C3, U1                                                                                                                                         | Mesophiles: C3, U1<br>Thermophiles: C3, U1                                                                                                                                         |
| Contributions from the three codon sites to the stem pairs                    | Mesophiles:<br>Site 3 > Site 1 > Site 2<br>Thermophiles:<br>Site 3 > Site 1 > Site 2                                                                                               | Mesophiles:<br>Site 3 > Site 1 > Site 2<br>Thermophiles:<br>Site 3 > Site 1 > Site 2                                                                                               |
| Features in signification correlation with OGT                                | Phase 1: U2:3G (R = +0.56)<br>Phase 2: U1:3G (R = +0.57)<br>Phase 3: C2:1G (R = -0.50)                                                                                             | None                                                                                                                                                                               |
| <b>Purified signal (Nat/dShuffl)</b>                                          |                                                                                                                                                                                    |                                                                                                                                                                                    |
| The most and least frequent pairs in stem regions of mRNA secondary structure | Mesophiles:<br>Phase 1: C2:3G, G2:3U<br>Phase 2: C3:1G, G1:3U<br>Phase 3: A3:3U, U3:3G<br>Thermophiles:<br>Phase 1: G3:2C, G2:3U<br>Phase 2: C2:2G, G1:3U<br>Phase 3: A3:3U, U3:3G | Mesophiles:<br>Phase 1: G3:2U, U3:2G<br>Phase 2: A1:3U, G1:3U<br>Phase 3: G3:3C, U3:3G<br>Thermophiles:<br>Phase 1: C2:3G, G2:3U<br>Phase 2: C3:1G, G1:3U<br>Phase 3: U3:3A, U3:3G |
| Contributions from the three pairing Phases to the stem pairs                 | Mesophiles:<br>Phase 3 > Phase 2 > Phase 1<br>Thermophiles:<br>Phase 3 > Phase 2 > Phase 1                                                                                         | Mesophiles:<br>Phase 3 > Phase 2 > Phase 1<br>Thermophiles:<br>Phase 3 > Phase 1 > Phase 2                                                                                         |
| The most and least frequent nucleotide involved in pairing                    | Mesophiles: C3, A2<br>Thermophiles: C3, U3                                                                                                                                         | Mesophiles: A1, U3<br>Thermophiles: A3, U3                                                                                                                                         |
| Contributions from the three codon sites to the stem pairs                    | Mesophiles:<br>Site 3 > Site 1 > Site 2<br>Thermophiles:<br>Site 3 > Site 1 > Site 2                                                                                               | Mesophiles:<br>Site 3 > Site 2 > Site 1<br>Thermophiles:<br>Site 3 > Site 2 > Site 1                                                                                               |
| Features in signification correlation with OGT                                | Phase 1: U3:2G (R = +0.76)<br>Phase 2: U3:1G (R = +0.60)<br>Phase 3: None                                                                                                          | None                                                                                                                                                                               |

**Table S2. Purine loading in loop and stem regions of folded mRNA of archaea and bacteria, and its OGT correlation.**

| Feature                          | Loop         |        | Stem  |         | Comparison<br>p-value |
|----------------------------------|--------------|--------|-------|---------|-----------------------|
|                                  | Mean Content | OGT    | Mean  | OGT     |                       |
| <b>Archaea</b>                   |              |        |       |         |                       |
| A+G                              | 0.596        | 0.46*  | 0.500 | -0.29   | 4.9E-27               |
| R/Y                              | 1.494        | 0.44*  | 1.001 | -0.29   | 4.9E-27               |
| ApG                              | 0.073        | 0.83** | 0.059 | 0.62**  | 0.0007                |
| GGR(glycine)                     | 0.032        | 0.44*  | 0.052 | 0.16    | 1.5E-14               |
| GGY(glycine)                     | 0.015        | 0.18   | 0.064 | 0.16    | 3.4E-26               |
| AGR(arginine)                    | 0.046        | 0.68** | 0.028 | 0.55**  | 9.2E-11               |
| CGR(arginine)                    | 0.016        | -0.28  | 0.032 | -0.31   | 0.0024                |
| CGY(arginine)                    | 0.012        | -0.10  | 0.026 | -0.12   | 0.0010                |
| GAR(glutamate)                   | 0.069        | 0.60** | 0.044 | 0.48*   | 4.2E-18               |
| AAR(lysine)                      | 0.096        | -0.03  | 0.018 | 0.01    | 2.2E-23               |
| GAY(aspartic)                    | 0.038        | -0.27  | 0.042 | -0.63** | 0.0158                |
| <b>Bacteria</b>                  |              |        |       |         |                       |
| A+G                              | 0.539        | 0.48** | 0.501 | 0.08    | 4.6E-12               |
| R/Y                              | 1.188        | 0.51** | 1.002 | 0.08    | 4.6E-12               |
| ApG                              | 0.054        | 0.58** | 0.046 | 0.22    | 0.0020                |
| GGR(glycine)                     | 0.025        | 0.69** | 0.041 | 0.46**  | 3.4E-10               |
| GGY(glycine)                     | 0.018        | -0.02  | 0.088 | -0.25   | 6.9E-28               |
| AGR(arginine)                    | 0.028        | 0.58** | 0.019 | 0.37*   | 8.5E-08               |
| CGR(arginine)                    | 0.020        | -0.07  | 0.044 | -0.08   | 2.5E-07               |
| CGY(arginine)                    | 0.018        | -0.16  | 0.043 | -0.18   | 9.8E-09               |
| GAR(glutamic)                    | 0.054        | 0.70** | 0.032 | 0.51**  | <2.2E-16              |
| AAR(lysine)                      | 0.081        | 0.30*  | 0.017 | 0.18    | <2.2E-16              |
| GAY(aspartic)                    | 0.037        | -0.17  | 0.040 | -0.33*  | 0.0046                |
| <b>Both Archaea and Bacteria</b> |              |        |       |         |                       |
| A+G                              | 0.560        | 0.59** | 0.500 | -0.26*  | <2.2E-16              |
| R/Y                              | 1.299        | 0.61** | 1.002 | -0.26*  | <2.2E-16              |
| ApG                              | 0.061        | 0.79** | 0.051 | 0.50**  | 0.0002                |
| GGR(glycine)                     | 0.027        | 0.62** | 0.045 | 0.42**  | 1.2E-17               |
| GGY(glycine)                     | 0.017        | -0.05  | 0.079 | -0.23*  | 1.0E-42               |
| AGR(arginine)                    | 0.035        | 0.72** | 0.022 | 0.56**  | 2.4E-10               |
| CGR(arginine)                    | 0.018        | -0.22  | 0.040 | -0.24*  | 7.1E-09               |
| CGY(arginine)                    | 0.016        | -0.25* | 0.037 | -0.26*  | 6.2E-10               |
| GAR(glutamic)                    | 0.060        | 0.71** | 0.036 | 0.59**  | <2.2E-16              |
| AAR(lysine)                      | 0.086        | 0.22   | 0.017 | 0.11    | <2.2E-16              |
| GAY(aspartic)                    | 0.037        | -0.17  | 0.040 | -0.37** | 0.0002                |

'OGT correlation' column shows the correlation coefficient, with '\*' indicating p-value < 0.01 and '\*\*' indicating p-value < 0.0001. Comparison was performed between Loop region and Stem region by Wilcoxon-tests and p-values are shown in the last column.
